# Supplementary material
Source: PubMed Central journal article supplement (PMC3355538)

## Supplemental Information

Enhanced GLP-1- and Sulfonylurea-Induced Insulin Secretion in Islets Lacking Leptin Signaling

Tomoaki Morioka, John. F. Dishinger, Kendra. R. Reid, Chong Wee Liew, Ting Zhang, Masaaki Inaba, Robert. T. Kennedy and Rohit. N. Kulkarni

### Materials and Methods

#### Long-term treatment of mouse islets with free fatty acid.

Mouse islets were isolated from ObRlox or ObRKO mice and incubated with control media with 5% FBS and 0.25% BSA or 0.5 mM palmitate (Sigma) for 48 hours. Subsequently, a single islet was perfused in a microfluidic chamber with different concentrations of glucose, with or without 10 nM leptin, as indicated. The  $[Ca^{2+}]_i$  and insulin release in islet were measured as described in Materials and Methods.

### Figure Legends

**Supplemental Fig. 1:** Islets lacking leptin receptor exhibit impaired glucose-stimulated  $[Ca^{2+}]_i$  increase and insulin release induced by long-term fatty acid treatment. A, B, D and E, Representative traces of  $[Ca^{2+}]_i$  (A and B) and insulin release (D and E) measured in primary, size-matched islets isolated from 6-month-old male ObRlox (A and D) and ObR-KO (B and E) mice in different glucose concentrations with or without 10 nM leptin after 48-hour pre-incubation with 0.5 mM palmitate or 0.25 % BSA. C, Average  $[Ca^{2+}]_i$  is expressed as % basal (mean  $\pm$  SEM, \*\*,  $P < 0.01$ ;  $n = 5$ ). F, Average insulin release value (pg/min) (mean  $\pm$  SEM, \*,  $P < 0.05$ ;  $n = 5$ ).

**Supplemental Fig. 2:** Mouse islets exhibiting significant first-phase insulin secretion in response to glucose and GLP-1. Representative traces of insulin release measured in primary size-matched islets isolated from 6-month-old male ObRlox (left) and ObR-KO (right) mice and treated with 8.0 mM glucose and 10 nM GLP-1 (7-36) amide.

# Supplemental FIG. 1.

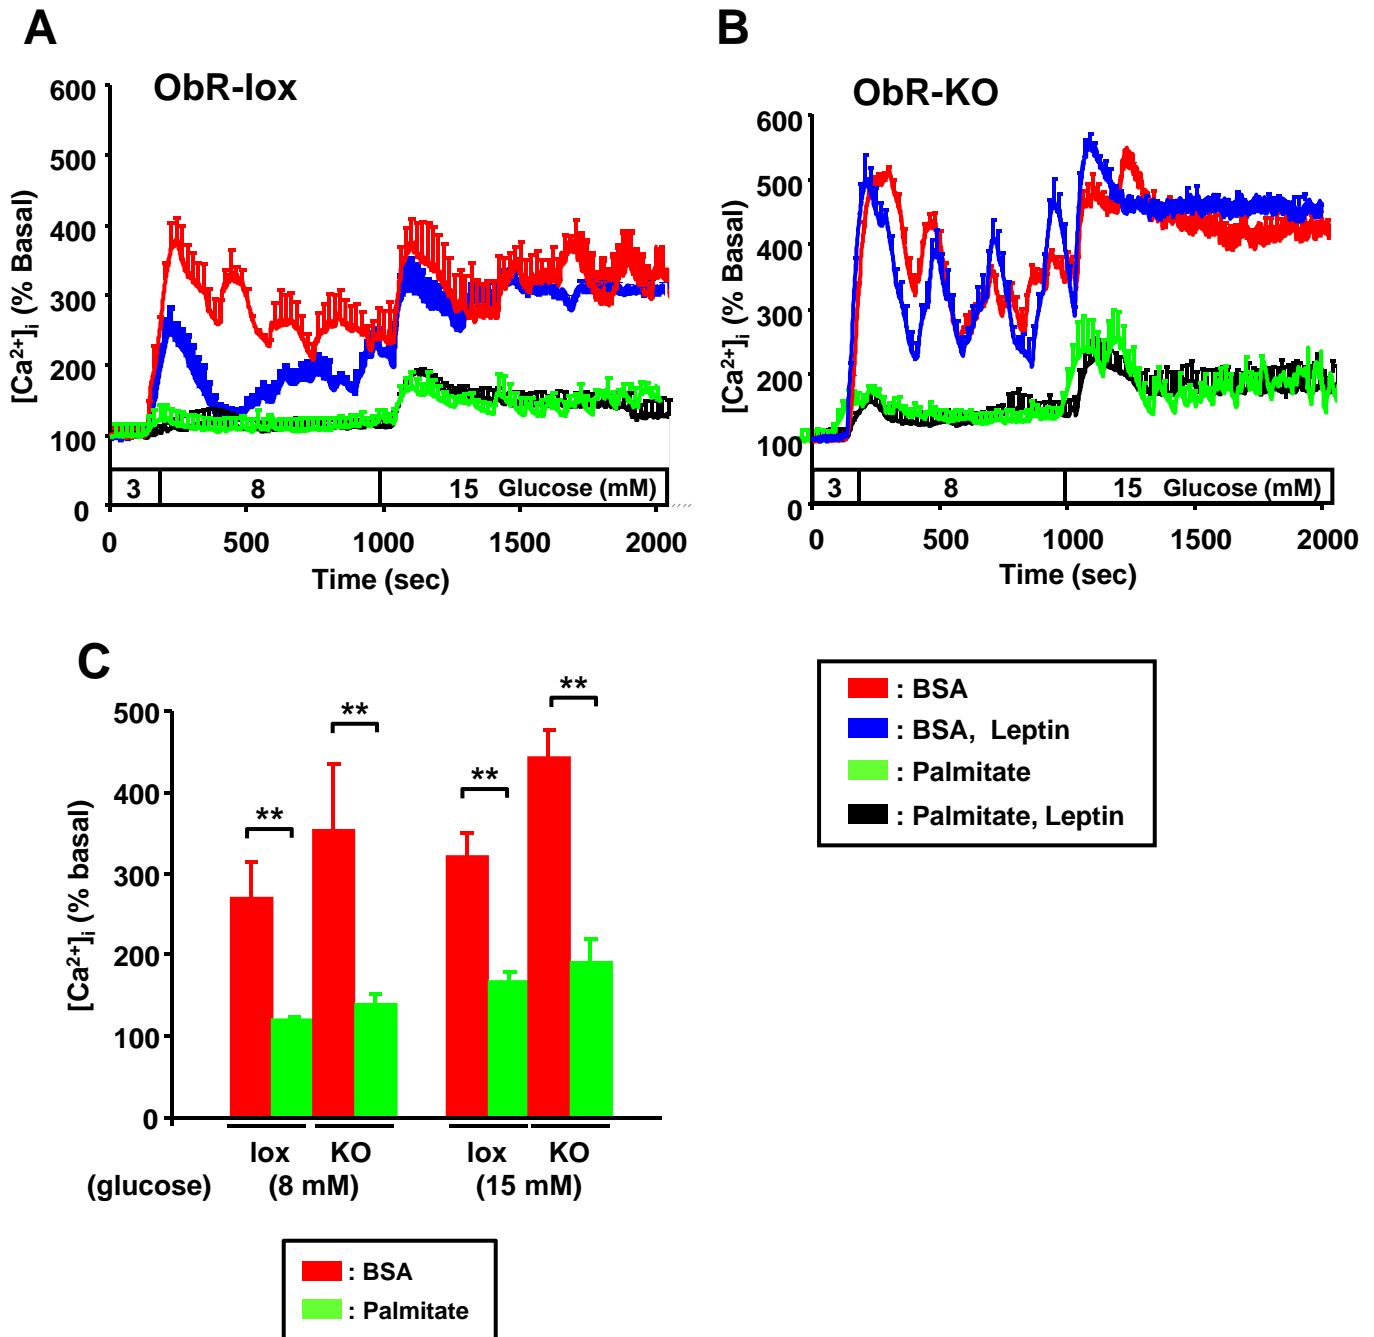

**D**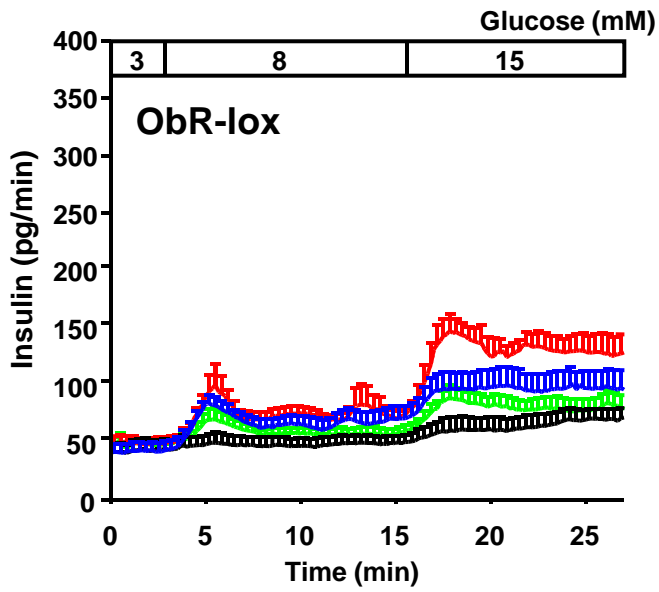**E**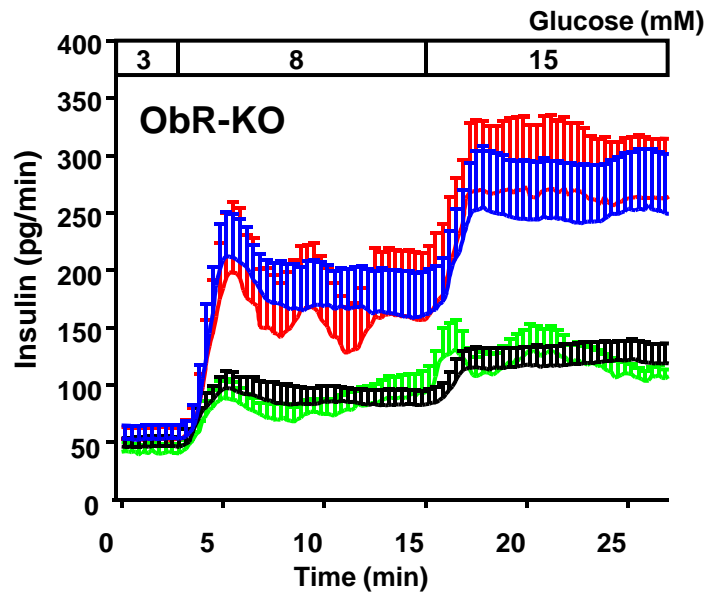**F**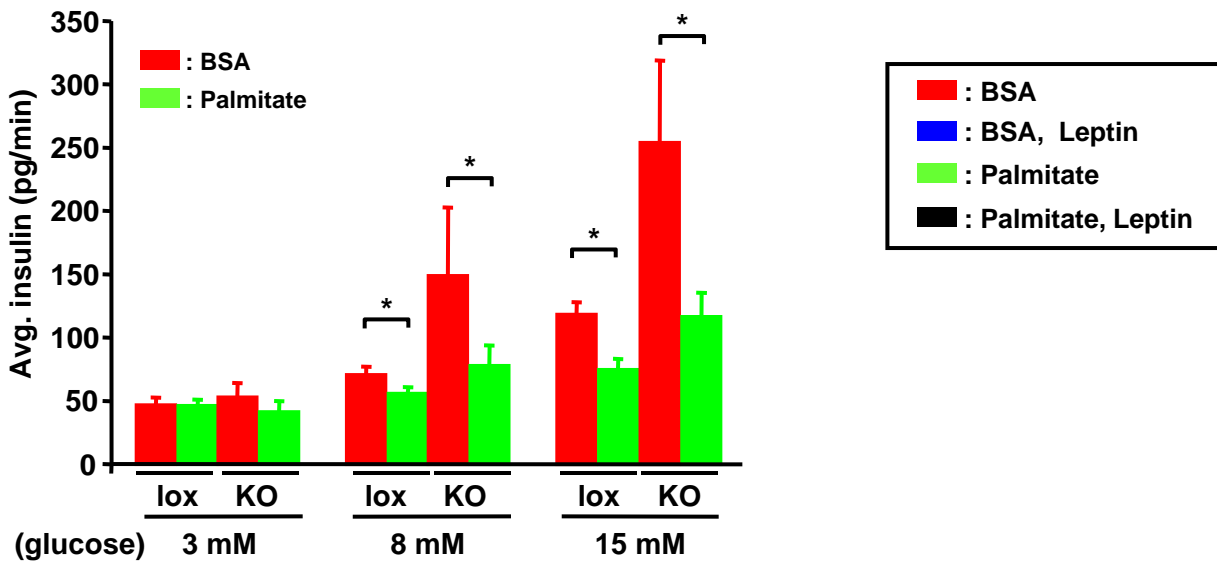

# Supplemental FIG. 2.

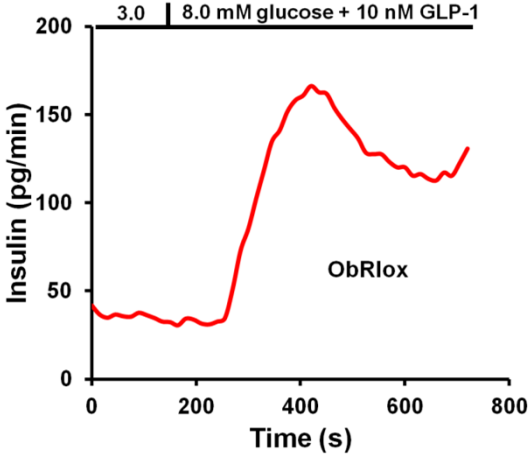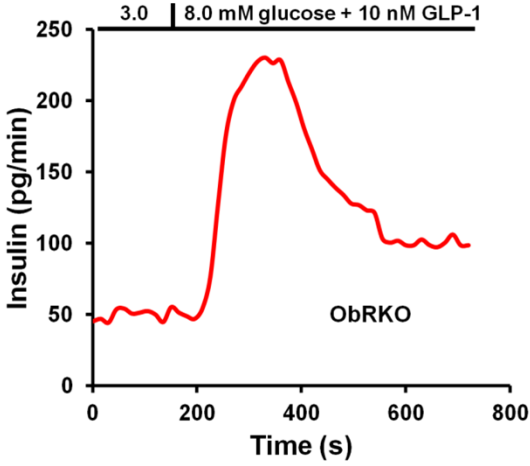

Supplement: supp_me.2011-1306_11-1306_figsx2.pdf [file supp_me.2011-1306_11-1306_figsx2.pdf]
